# Supplementary material for: Drosophila TDP-43 RNA-Binding Protein Facilitates Association of Sister Chromatid Cohesion Proteins with Genes, Enhancers and Polycomb Response Elements
Source: PubMed Central journal article supplement (PMC5035082; doi:10.1371/journal.pgen.1006331), 2016-09-23
Supplement: pgen.1006331.s013.pdf [file pgen.1006331.s013.pdf]

| Name             | Sequence                                                                                  | Lark Binding | TBPH Binding | Binds cohesin |
|------------------|-------------------------------------------------------------------------------------------|--------------|--------------|---------------|
| <b>CG8177-1</b>  | GGAACUGUAAAUCAUU <b>CGUUC</b> GGAACGUGC<br>UGCUGCUCGGACGGAAACGCAGAAACUG                   | Yes          | No           | Yes           |
| <b>CG8177-2</b>  | ACUGCGGAUAAAAGGCGGACAUAUUUUUAGA<br>GCUCGCCAAGUUCAAGUUUGCGA                                | No           | No           | Yes           |
| <b>CG8177-3</b>  | UCGCCAAGUUCAAGUUUGCGACGAAACACAGA<br>AAGUGGUAAAACCGUACGCG                                  | No           | No           | Yes           |
| <b>CG8177-4</b>  | AUAUACAAAAGGUUCCACCACCAAC <b>GUG</b> CGCA<br>CACGCAACAAUAGCAACA                           | No           | Yes          | Yes           |
| <b>CG8177-5</b>  | GCACACGCAACAAUAGCAACAACAACAAAAA<br>AAAGCGCCGUUGUUUUUUGUCU                                 | No           | No           | Yes           |
| <b>CG8177-6</b>  | CGCCGUUGUUUUUUGUCUCUUUCCUGCCAA<br>UUUUUUUGUGUUUCUCAUUGCCUCUGC                             | No           | No           | Yes           |
| <b>CG8177-7</b>  | CCCUCUGCUUUAUCGUCUGUUUUUUUUCG<br>AC <b>CGUUC</b> GCUCCC <b>CGUUC</b> UUUCUCCUU            | Yes          | No           | Yes           |
| <b>CG8177-8</b>  | <b>CGCGUUC</b> UUUCUCCUUCUCCAGCCAGCGCGA<br><b>GUGUGUGUGUGUGUC</b> CG                      | Yes          | Yes          | Yes           |
| <b>CG8177-9</b>  | AUAUACAAAAGGUUCCACCACCAACGUGCGCA<br>CACGCAACAAUAGCAACAACAACAAAAA<br>GCGCCGUUGUUUUUUGUCUCU | No           | No           | Yes           |
| <b>CG6310-1</b>  | GCCCUGCUCUCUAUGUCUUCGUUUUCUCA<br>GUGGCUATCAGAAGTACCAGAUCCAGGGC                            | No           | No           | No            |
| <b>CG6310-2</b>  | CGAGGGCAUUUAUCAAGCAGAGUCAACCGGAAA<br>AGGUCUGGGAGUAUGUGGCGGAUU                             | No           | No           | No            |
| <b>CG6310-3</b>  | AAGGUCUGGGAGUAUGUGGCGGAUUUUAUA<br>AGAUGCGUCUGCTCAAUCCACCAU                                | No           | No           | No            |
| <b>CG6310-4</b>  | CCUAGCUGAUCAUGGCCACGCCACGACUGG<br>CGUUACACGGUGCAGUACAC                                    | No           | No           | No            |
| <b>CG6310-5</b>  | UGGUCACCAAGUCAUUACCCGGAGUAUCGCC<br>CGUGGCCUAUGCCAUUAAGU                                   | No           | No           | No            |
| <b>CG6310-6</b>  | <b>ACGUUC</b> AGAAACUCCAUGGUGAUACCUUUGC<br>CCAGGAGAACAUCAGUA                              | No           | No           | No            |
| <b>CG13089-1</b> | GCUUUUUACAGGCGGAGUC <b>CGUUC</b> ACAAAAAC<br>UAUGCCCAACUAGAAGAUUGGAUUCG                   | No           | No           | No            |
| <b>cut-1</b>     | CAGCAUUCGUGACUGGCAACGUCGUUU <b>CGUU</b><br><b>CGUCCGUCGCCGAAAGAAU</b> CGAGA               | Yes          | No           | Yes           |
| <b>Notch-1</b>   | AGUGGUGUACAGUGGUCACUCAUUAUUG<br>UA <b>UGUGUGUGUGUGUGU</b> AUCGG <b>CGUUC</b>              | No           | Yes          | Yes           |
| <b>trol-1</b>    | UUUGGCCUGAAGGAGGGAGGGGUCGC <b>UGUG</b><br><b>UGUGUGUGUGCGAGUGUGUGUGUGU</b> AUG            | Yes          | Yes          | Yes           |
| <b>trol-2</b>    | UGACUCUUGGACCAAAAGCCAAACUUGAUUA<br>UUUCCUGUUUC <b>UGUGUGUGUGUG</b> CGUGUUG                | No           | Yes          | Yes           |
| <b>rho-1</b>     | GCGACUCGAAACUGAAUUUGAAACUGAAAGAA<br>AGAAAUUAUCAAAUUGUC <b>GUGUGUGUG</b>                   | Yes          | NT           | Yes           |
| <b>rho-2</b>     | CACAAAAGCAACAACGGUGC <b>GUGUGUG</b> CAAUG<br>CGACUUGAGG                                   | Yes          | NT           | Yes           |
| <b>rho-3</b>     | CCCAGAAUUUCGGGCUACCC <b>CGUUC</b> CGAUUCC<br>GUCGGAUUCGGUGCUGGUCUAU                       | No           | NT           | Yes           |
| <b>path-1</b>    | AAGUCCAGUUUGAAUGCCGCUUGAAU <b>CGUU</b><br><b>CAGAACUGU</b>                                | No           | NT           | Yes           |
| <b>path-2</b>    | AAAACAAGAGCGCCAAUGCCGCACAACGUGAU<br>GAUUG <b>CGUUC</b> UCCACAGGAUCCA                      | No           | NT           | Yes           |
| <b>path-3</b>    | CUGCC <b>CGUUC</b> CCGUCCAUAUGGAAUCAACUGC<br>UCAAGUUCGAGGCCA                              | No           | NT           | Yes           |
| <b>path-4</b>    | GUGGCUUUGGGAUUUGAUUUGCUUCAAUUG <b>CG</b><br><b>UUC</b> UAUACGAUCGCUAUUUACAUUGGGCC         | Yes          | NT           | Yes           |
| <b>path-5</b>    | CGCGA <b>GUGU</b> ACUAAAACGUGCUAAAACGGCAU<br>AAUGGUGCUCGGUA <b>GUGUG</b> CUAC             | Yes          | NT           | Yes           |
| <b>path-6</b>    | GUGGGGCAUUGCAUUGAC <b>GUGUGUGUG</b> CAG<br>ACAGCUAUG                                      | Yes          | NT           | Yes           |
| <b>path-7</b>    | UCGGCCAUGUCCUUGAUGACUCAGUUCGAAU<br>CGGUCUAAAA <b>GUGUGUG</b> GGCGUGG                      | No           | NT           | Yes           |
